# Supplementary material for: Norovirus GII.17 as Major Epidemic Strain in Italy, Winter 2015–16
Source: PubMed Central journal article supplement (PMC5512478; doi:10.3201/eid2307.161255), 2017-07
Supplement: 16-1255-Techapp-s1.pdf [file 16-1255-Techapp-s1.pdf]

# Norovirus GII.17 as Major Epidemic Strain in Italy, Winter 2015–16

## Technical Appendix

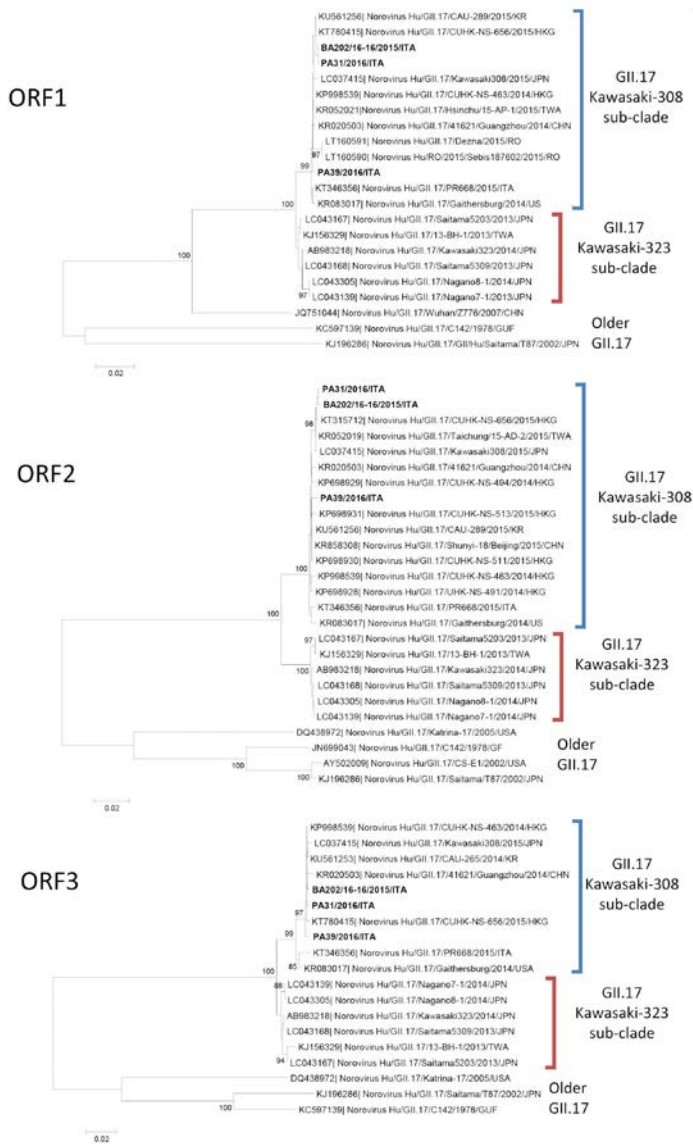

**Technical Appendix Figure.** Phylogenetic analysis based on partial sequence of ORF1 (822 nt), the full-length sequence of ORF2 (1621 nt) and ORF3 (866 nt) sequences of GII.P17\_GII.17 noroviruses. The GII.P17\_GII.17 strains from Italy are indicated in bold. The trees were built with the Neighbor-joining method and Kimura 2-parameter model, with bootstrapping over 1000 repetitions. Bootstrap values >80% are indicated. The scale bar indicates the number of nucleotide substitutions per site.
